# Supplementary material for: Epithelial–mesenchymal transition in lung development and disease: does it exist and is it important?
Source: HighWire-hosted journal article supplement (doi:10.1136/thoraxjnl-2013-204608), 2013-12-12
Supplement: thoraxjnl-2013-204608supp.pdf [file thoraxjnl-2013-204608supp.pdf]

| Disease | Reference             | Model                                                                                                          | Methods/<br>Treatment                                                                          | Markers |               |          | Other markers                                                                             | Main results                                                                                                                                                                                                                                                                                                                                                                                                                                            |
|---------|-----------------------|----------------------------------------------------------------------------------------------------------------|------------------------------------------------------------------------------------------------|---------|---------------|----------|-------------------------------------------------------------------------------------------|---------------------------------------------------------------------------------------------------------------------------------------------------------------------------------------------------------------------------------------------------------------------------------------------------------------------------------------------------------------------------------------------------------------------------------------------------------|
|         |                       |                                                                                                                |                                                                                                | E-cad   | $\alpha$ -SMA | Vimentin |                                                                                           |                                                                                                                                                                                                                                                                                                                                                                                                                                                         |
| BPD     | Deng C et al (1)      | Murine model of hyperoxia-induced BPD, GFP-tagged bone marrow (BM) chimera mice                                | 60% oxygen for 14 days, CXCL12 chemotaxis assay                                                | N       | Y             | N        | S100A4, TTF-1, Pro-Surfactant Protein-B, Collagen I, CXCR4                                | GFP-tagged BM-derived fibroblasts were engrafting the lung in active fibrotic areas; there were significantly more BM-derived CXCR4+ fibroblasts in the lungs of O2 treated animals than in controls; BM-derived TTF-1+ epithelial cells were detected in injured lungs                                                                                                                                                                                 |
| Asthma  | Heijink I et al (2)   | Bronchial epithelial cell line, Primary bronchial epithelium (hBEC), in vitro                                  | TGF- $\beta$ 1, House dust mite (HDM) allergen                                                 | Y       | N             | Y        | EGFR, $\alpha$ -catenin activation, cytokeratin (KRT), Myosin light chain phosphorylation | HDM allergen acted synergically with TGF- $\beta$ 1 in inducing EMT in primary hBECs.                                                                                                                                                                                                                                                                                                                                                                   |
|         | Hackett T-L et al (3) | hBEC from patients with asthma (8) and healthy controls (10)                                                   | TGF- $\beta$ 1 SMAD3 siRNA, BMP-7                                                              | Y       | N             | Y        | Fibronectin (FN), collagen-1, occludin-1                                                  | In vitro evidence for EMT in hBEC; basal epithelial cells are especially sensitive to EMT as in vitro data suggest; no histological evidence for EMT in sections from matched asthmatic patients                                                                                                                                                                                                                                                        |
|         | Hackett T-L et al (4) | hBEC cell lines 16HBE and BEAS-2B; primary hBEC from healthy controls and from patients with asthma            | HDM allergen; epidermal growth factor (EGF)                                                    | Y       | N             | N        | Caveolin-1 (Cav-1), $\beta$ -catenin, Thymic Stromal Lymphopoietin (TSLP),                | Cav-1 levels, junctional E-cadherin and $\beta$ -catenin were significantly lower, TSLP levels were higher in asthma patients compared to controls; EGF and HDM treatment induced E-cad redistribution and Cav-1 internalization in 16HBE cells. Cav-1-specific siRNA inhibited E-cad internalisation and barrier dysfunction in 16HBE cells; Cav-1 overexpression restored barrier dysfunction and reduced TSLP levels in BEAS-2B cells.               |
|         | Johnson II et al (5)  | HDM-induced asthma in ROSA-26/SPC-Cre-LacZ reporter mice                                                       | HDM for 15 weeks                                                                               | Y       | Y             | Y        | TGF- $\beta$ 1, occludin, pro-collagen I, SNAIL                                           | LacZ+/ $\alpha$ -SMA+ cells were incorporated into airway smooth muscle; LacZ+/Vim+ cells were present in the sub-epithelium; 30% of Vim+ cell were also LacZ+                                                                                                                                                                                                                                                                                          |
| BOS     | Hodge et al (6)       | Bronchial brushings from lung transplant (LTx) patients with (6) or without BOS (16)                           | N/A                                                                                            | N       | Y             | N        | Flow cytometry, S100A4 FN, HLA-DR; TGF- $\beta$ 1 and HGF levels in BALF-ELISA            | EMT markers $\alpha$ -SMA, S100A4 FN and HLA-DR were increased in epithelial cells from BOS patients compared to stable LTx patients; Increased levels of HGF but not TGF- $\beta$ 1 in the BALF of BOS patients.                                                                                                                                                                                                                                       |
| BOS     | Ward et al            | Endobronchial biopsy and brushings from 16 stable Ltx patients                                                 | TGF- $\beta$ 1                                                                                 | N       | N             | N        | S100A4 IHC, MMP-2, 7 and 9 zymography, invasion assay                                     | A median 15% of the biopsy epithelium stained for S100A4 and MMP-7 in stable lung transplant recipients; Epithelial cultures from lung allografts were positive for S100A4 and MMP-2 and 9 showed zymographic activity. MMP total protein and activity was increased after TGF- $\beta$ 1 treatment; Both TGF- $\beta$ 1 stimulated and non-stimulated epithelial cells were invasive, invasion capacity was higher in TGF- $\beta$ 1 stimulated cells. |
| BOS     | Borthwick et al (7)   | In vitro culturing of hBEC form obtained via bronchial brushing from stable LTx patients, co-culture with THP- | TGF $\beta$ 1 with or without P.aeruginosa cell lysate (lab. strain and clinical isolates (9)) | Y       | N             | Y        | IL-8, IL-1 $\beta$ , TNF- $\alpha$ , FN, KRT-19                                           | Supernatants, but not co-cultures of THP-1 cells treated with P.aeruginosa accentuated EMT on cultured hBECs. Clinical isolates of P.aeruginosa induced significantly higher production of inflammatory cytokines in THP-1s than the reference strain.                                                                                                                                                                                                  |

|     |                     |                                                                                                                                             |                                        |   |   |   |                                                                                                                 |                                                                                                                                                                                                                                                                     |
|-----|---------------------|---------------------------------------------------------------------------------------------------------------------------------------------|----------------------------------------|---|---|---|-----------------------------------------------------------------------------------------------------------------|---------------------------------------------------------------------------------------------------------------------------------------------------------------------------------------------------------------------------------------------------------------------|
| BOS | Borthwick et al.(8) | In vitro culturing of hBEC form obtained via bronchial brushing from stable LTx patients                                                    | TGF- $\beta$ , TNF- $\alpha$           | Y | Y | Y | FN, KRT-19, S100A4, MMP-9 zymography, Matrigel invasion assay, collagen synthesis                               | Bronchial epithelium upregulating EMT and downregulating epithelial markers in BOS but not in stable transplants; epithelial cells; TNF- $\alpha$ accentuates TGF $\beta$ -induced EMT and cell migration, but not ECM deposition.                                  |
| BOS | Millara et al (9)   | In vitro culture of hBECs isolated from small airways (>1mm) of non-smokers (5), smokers (12) and COPD patients (15); IHC of tissue samples | Cigarette Smoke Extract (CSE)          | Y | Y | Y | collagen type I, NOX4, ZO-1 (IHC); TGF- $\beta$ 1, cAMP and MMP-9 (ELISA) ERK1/2 and Smad3 phosphorylation (WB) | hBECs from smokers and COPD patients but not from controls show EMT; CSE-induced EMT is mediated by the ROS and downregulation of cAMP;                                                                                                                             |
| BOS | Zou et al           | HBEC cell line                                                                                                                              | Nicotine, Wnt-3a, TGF- $\beta$ 1 siRNA | Y | Y | Y | MMP-9, Collagen-I                                                                                               | Nicotine treatment leads $\beta$ -catenin to nuclear translocation, E-cad downregulation, $\alpha$ SMA, Vim, Col-1, MMP-9 and TGF- $\beta$ 1 upregulation in HBECs; Knockdown of Wnt3a and TGF- $\beta$ 1 using specific siRNA constructs prevented these effects.. |

| Disease | Reference            | Model                                                                                                                                                              | Methods/<br>Treatment                                                                              | Markers |               |          | Other markers                                                                                                                 | Main results                                                                                                                                                                                                                                                                                                                                                                                                                                    |
|---------|----------------------|--------------------------------------------------------------------------------------------------------------------------------------------------------------------|----------------------------------------------------------------------------------------------------|---------|---------------|----------|-------------------------------------------------------------------------------------------------------------------------------|-------------------------------------------------------------------------------------------------------------------------------------------------------------------------------------------------------------------------------------------------------------------------------------------------------------------------------------------------------------------------------------------------------------------------------------------------|
|         |                      |                                                                                                                                                                    |                                                                                                    | E-cad   | $\alpha$ -SMA | Vimentin |                                                                                                                               |                                                                                                                                                                                                                                                                                                                                                                                                                                                 |
| COPD    | Sohal et al (10, 11) | Endobronchial biopsies from non-smokers(15); ex-smokers with COPD(15), smokers with normal lung function(16) and current smokers (17)                              | N/A                                                                                                | N       | N             | Y        | IHC for S100A4, MMP-9, KRT and EGFR                                                                                           | Evidence for Rbm fragmentation / remodelling, increased EGFR expression of epithelial cells in COPD patients and smokers compared to non-smoker control(11), 7.2% of basal epithelial cells and cells in the Rbm frequently co-express KRT and S100A4 suggesting EMT in vivo(10).                                                                                                                                                               |
| COPD    | Wang et al           | Lung tissue samples obtained during lobectomy from 25 non-smokers, 25 smokers with and 18 smokers without COPD; Human primary small airway epithelial cells (SAEC) | CSE extract, uPAR-1 and 2-specific siRNA constructs;                                               | Y       | Y             | Y        | uPAR, $\alpha$ -catenin, N-cadherin, p-Akt, p-GSK-3 $\beta$                                                                   | Increased expression of EMT markers and uPAR small airway epithelium (SAE) of patients with COPD compared to controls; Vimentin and uPAR expression are correlated in SAE; CSE-induced EMT in SAEC was associated with high uPAR expression; Targeted silencing of uPAR inhibited CSE-induced EMT; uPAR mediates EMT in SAEC through the PI3K/Akt signaling pathway.                                                                            |
| COPD    | Chung et al.         | C57Bl/6 mice were exposed to cigarette smoke for up to 6 months                                                                                                    | Smoke of 2R1 Kentucky research cigarettes in various doses                                         | N       | N             | N        | Procollagen, TGF- $\beta$ 1, platelet-derived growth factor (PDGF)-A, PDGF-B, connective tissue growth factor (CTGF), p-SMAD2 | With a single smoke exposure, increases in procollagen, CTGF, TGF- $\beta$ 1, PDGF-A and -B expression were seen after 2 h of smoke exposure; With chronic smoke exposures increases in procollagen, CTGF, PDGF-B expression persisted through 1 wk, 1 mo, and 6 mo; Increased p-Smad2 was present at all time points, indicating constitutively active TGF- $\beta$ signalling; Small airways in smoke-exposed mice had more collagen at 6 mo. |
| COPD    | Milara et al.        | Air-liquid interface (ALI) cultures were set up from HBECS from non-smokers (n=5), smokers (n=12) and patients with COPD (n=15)                                    | CSE exposure                                                                                       | Y       | Y             | Y        | collagen-I, NOX4, ZO-1, MMP-9                                                                                                 | EMT markers were upregulated and epithelial markers were downregulated in HBECS of smokers and patients with COPD compared with non-smokers; CSE exposure caused EMT within 72 h in in vitro differentiated HBECS; CSE effects were mediated by intracellular reactive O2 species, autocrine action of TGF- $\beta$ 1, activation of ERK1/2 and Smad3 and by the downregulation of cAMP                                                         |
| IPF     | Kim et al (12)       | ROSA-26/SPC-Cre-LacZ reporter mice, in vitro culture of transgenic ATILs                                                                                           | Intranasal Adeno-TGF- $\beta$ 1, culturing ATILs on Matrigel or FN, TGFR kinase inhibitor SB431542 | N       | Y             | N        | Pro-SP-C, FN, N-cad, p-SMAD2, TUNEL                                                                                           | Lung injury induced by TGF- $\beta$ 1 expressing adenoviri causes massive EMT AECs; genetic fate tracking proves epithelial origin of myofibroblasts. Culturing genetically tagged AECs on FN but not on Matrigel induces EMT by activating intracellular TGF- $\beta$ /SMAD signalling through $\alpha$ v $\beta$ 6 integrin.                                                                                                                  |

|     |                      |                                                                                                   |                                                                          |   |   |   |                                                                        |                                                                                                                                                                                                                                                                                                                                                       |
|-----|----------------------|---------------------------------------------------------------------------------------------------|--------------------------------------------------------------------------|---|---|---|------------------------------------------------------------------------|-------------------------------------------------------------------------------------------------------------------------------------------------------------------------------------------------------------------------------------------------------------------------------------------------------------------------------------------------------|
| IPF | Tanjore et al (13)   | ROSA-26/SPC-Cre-LacZ reporter mice, in vitro culture of transgenic ATIIIs                         | IT bleomycin (single 0.08U dose)                                         | N | Y | N | S100A4, pro-SP-C                                                       | Approximately one-third of S100A4+ fibroblasts are derived from tagged epithelial cells; $\alpha$ -SMA+ myofibroblasts are a distinct population from EMT-derived S100A4+ Fibroblasts; some S100A4+ Fibroblasts derive from bone marrow                                                                                                               |
| IPF | Deagryse et al. (14) | ROSA-26/SPC-Cre-LacZ reporter mice                                                                | IT bleomycin (0.04U given biweekly 8 times)                              | N | Y | N | pro-SP-C, Clara cell 10 (CC-10), $\beta$ -galactosidase, S100A4, TUNEL | Repetitive bleomycin dosing results in greater lung fibrosis, less neutrophilic inflammation, greater cell death, and more prominent EMT compared with the single-dose model; one-half of the S100A4+ fibroblasts were of epithelial lineage. The authors suggest this recapitulates better the features of IPF than the single-dose bleomycin model. |
| IPF | Harada et al (15)    | 13 patients with UIP histology; 11 IPF, 2 autoimmune; 10 control patients w/ normal lung function | N/A                                                                      | N | Y | Y | Pro-SP-B, TTF-1, KRT7/8 (CAM5.2)                                       | -SMA were detectable in some epithelial cells covering the fibroblastic foci in UIP but not in healthy control lungs. Spindle-shaped cells positive for TTF-1, ProSP-B, and KRT7/8 were detectable in the fibroblastic foci of UIP lungs.                                                                                                             |
| IPF | Rock et al (16)      | ROSA-26 / Sftpcrm1-Cre-Tomato transgenic reporter mice                                            | IT bleomycin (1.25 U/kg – 5 U/kg body weight dose) in a single injection | N | Y | Y | SP-C; AQP-5; S100A4; NG2; Desmin; CC-10; PECAM                         | Proliferating fibroblasts were derived from NG2+ and/or PDGFRB+ stromal populations but not from SP-C+ or CC-10+ epithelial cells using genetically tagged murine models.                                                                                                                                                                             |

| Disease     | Reference           | Model                                                                                                                                                                  | Methods/<br>Treatment                                       | Markers |       |          | Other markers                                                                                                                                | Main results                                                                                                                                                                                                                                                                                                           |
|-------------|---------------------|------------------------------------------------------------------------------------------------------------------------------------------------------------------------|-------------------------------------------------------------|---------|-------|----------|----------------------------------------------------------------------------------------------------------------------------------------------|------------------------------------------------------------------------------------------------------------------------------------------------------------------------------------------------------------------------------------------------------------------------------------------------------------------------|
|             |                     |                                                                                                                                                                        |                                                             | E-cad   | a-SMA | Vimentin |                                                                                                                                              |                                                                                                                                                                                                                                                                                                                        |
| Lung Cancer | Prudkin et al (17)  | Tissue from human lung cancers: squamous metaplasia (13), squamous dysplasia (34) & carcinoma in situ (20), Brain metastases: adenocarcinoma (37), squamous cell (11). | N/A                                                         | Y       | N     | Y        | N-Cadherin, Integrin $\alpha\beta 6$ , MMP-9, and phosphorylated EGFR. Methods: Tissue microarray construction, IHC, EGFR mutation analysis. | EMT phenotype was commonly expressed in dysplastic lesions, lung squamous cell carcinoma and adenocarcinoma. Brain metastases from these tumours expressed higher levels of E-cadherin than primary tumours implicating the occurrence of MET after dissemination.                                                     |
| Lung Cancer | Pirozzi et al (18)  | A549s (control) and LC31 (lung cancer primary cell line). LC31 cells grown as pneumospheres were subcutaneously injected in NOD/SCID mice.                             | TGF- $\beta 1$ 2ng/ml: A549s for 30 days, LC31s for 80 days | Y       | N     | Y        | KRT, N-cad, CD90, SLUG, TWIST, $\beta$ -catenin. Stem markers: Oct4, Nanog, Sox2, c-kit, CD133.                                              | TGF- $\beta 1$ lung cancer cells underwent EMT showing mesenchymal phenotype and LC31s also showed over-expression of stemness markers. TGF- $\beta 1$ treatment increased the pneumosphere-forming capacity and invasiveness of LC31s in NOD/SCID mice.                                                               |
|             | Ren et al (19)      | Cell lines: Doxetacel (DTX) sensitive and resistant human NSCLC line SPC-A1. Animal model: SPC-A1/DTX cells injected into nude mice.                                   | ZEB1 siRNA knockdown. DTX treatment.                        | Y       | N     | Y        | N-cad, KRT-19, TWIST. Methods: apoptosis assay, colony formation assay, wound healing assay, migration/invasion assays.                      | Acquisition of DTX resistance coincides with EMT/mesenchymal phenotype, an increased migratory and invasive capacity, increased ZEB1 expression. ZEB1 knockdown was found to reverse the EMT phenotype and inhibit the migratory ability of SPC-A1/DTXs, enhanced the chemo-sensitivity.                               |
|             | Tomimaga et al (20) | Human NSCLC lines: A549, PC-9, RERF-LC-KJ, and LC-2/ad                                                                                                                 | Cell lines were transfected to over-express miR-1.          | Y       | N     | Y        | Vinculin, occludin, SNAIL, SLUG, ZEB1                                                                                                        | miR-1 expression was down-regulated in lung cancer cell lines. Overexpression of miR-1 endowed A549 cells with epithelial features upregulated E-cad by inhibiting SLUG. miR-1 suppressed the migratory & invasive capacity of A549s.                                                                                  |
|             | Wlita et al (21)    | 21 NSCLC cell lines were used: squamous (4), large cell (5), adeno-carcinoma (10), & bronchio-alveolar (2).                                                            | Gefitinib, HDAC inhibitor (MS-275). E-cad transfection.     | Y       | N     | N        | EGFR, ZEB1                                                                                                                                   | Gefitinib sensitivity correlated with E-cad and ZEB1 expression. E-cad overexpression restored gefitinib sensitivity. HDAC inhibitor (MS-275) treatment induced E-cadherin & EGFR, and led to a growth-inhibitory & apoptotic effect with gefitinib treatment, even in resistant cell lines harbouring EGFR mutations. |

1. Deng C, Wang J, Zou Y, et al. Characterization of fibroblasts recruited from bone marrow-derived precursor in neonatal bronchopulmonary dysplasia mice. *J Appl Physiol* 2011;**111**(1):285-94.
2. Heijink IH, Postma DS, Noordhoek JA, et al. House Dust Mite–Promoted Epithelial-to-Mesenchymal Transition in Human Bronchial Epithelium. *Am J Resp Cell Mol Biol* 2010;**42**(1):69-79.
3. Hackett T-L, Warner SM, Stefanowicz D, et al. Induction of Epithelial–Mesenchymal Transition in Primary Airway Epithelial Cells from Patients with Asthma by Transforming Growth Factor- $\beta$ 1. *Am J Respir Crit Care Med* 2009;**180**(2):122-33.
4. Hackett T-L, de Bruin HG, Shaheen F, et al. Caveolin-1 Controls Airway Epithelial Barrier Function. Implications for Asthma. *Am J Respir Cell Mol Biol* 2013;**49**(4):662-71.
5. Johnson JR, Roos A, Berg T, et al. Chronic Respiratory Aeroallergen Exposure in Mice Induces Epithelial-Mesenchymal Transition in the Large Airways. *PLoS ONE*. 2011;**6**(1):e16175.
6. Hodge S, Holmes M, Banerjee B, et al. Posttransplant Bronchiolitis Obliterans Syndrome Is Associated with Bronchial Epithelial to Mesenchymal Transition. *Am J Transpl* 2009;**9**(4):727-33.
7. Borthwick LA, Sunny SS, Oliphant V, et al. *Pseudomonas aeruginosa* accentuates epithelial-to-mesenchymal transition in the airway. *Eur Respir J* 2011;**37**(5):1237-47.
8. Borthwick LA, Parker SM, Brougham KA, et al. Epithelial to mesenchymal transition (EMT) and airway remodelling after human lung transplantation. *Thorax*. 2009;**64**(9):770-7.
9. Milara J, Peiró T, Serrano A, et al. Epithelial to mesenchymal transition is increased in patients with COPD and induced by cigarette smoke. *Thorax* 2013;**68**(5):410-20
10. Sohal S, Reid D, Soltani A, et al. Evaluation of epithelial mesenchymal transition in patients with chronic obstructive pulmonary disease. *Respir Res* 2011;**12**(1):130.
11. Sohal SS, Reid D, Soltani A, et al. Reticular basement membrane fragmentation and potential epithelial mesenchymal transition is exaggerated in the airways of smokers with chronic obstructive pulmonary disease. *Respirology*. 2010;**15**(6):930-8.
12. Kim KK, Kugler MC, Wolters PJ, et al. Alveolar epithelial cell mesenchymal transition develops in vivo during pulmonary fibrosis and is regulated by the extracellular matrix. *Proc Natl Acad Sci U S A* 2006;**103**(35):13180-5.
13. Tanjore H, Xu XC, Polosukhin VV, et al. Contribution of Epithelial-derived Fibroblasts to Bleomycin-induced Lung Fibrosis. *Am J Respir Crit Care Med* 2009;**180**(7):657-65.
14. Degryse AL, Tanjore H, Xu XC, et al. Repetitive intratracheal bleomycin models several features of idiopathic pulmonary fibrosis. *Am J Physiol Lung Cell Mol Physiol* 2010;**299**(4):L442-L52.
15. Harada T, Nabeshima K, Hamasaki M, et al. Epithelial–mesenchymal transition in human lungs with usual interstitial pneumonia: Quantitative immunohistochemistry. *Pathol Int* 2010;**60**(1):14-21.
16. Rock JR, Barkauskas CE, Cronic MJ, et al. Multiple stromal populations contribute to pulmonary fibrosis without evidence for epithelial to mesenchymal transition. *Proc Natl Acad Sci U S A* 2011;**108**(52):E1475–E83.
17. Prudkin L, Liu DD, Ozburn NC, et al. Epithelial-to-mesenchymal transition in the development and progression of adenocarcinoma and squamous cell carcinoma of the lung. *Mod Pathol*. 2009;**22**(5):668-78.
18. Pirozzi G, Tirino V, Camerlingo R, et al. Epithelial to mesenchymal transition by TGF $\beta$ 1 induction increases stemness characteristics in primary non small cell lung cancer cell line. *PLoS ONE*. 2011;**6**(6):e21548.
19. Ren J, Chen Y, Song H, et al. Inhibition of ZEB1 reverses the phenotype of epithelial-mesenchymal transition and chemoresistance in docetaxel-resistant human lung adenocarcinoma cell line SPC-A1/DTX. *J Cel Biochem* 2012;**114**(6):1395-1403
20. Tominaga E, Yuasa K, Shimazaki S, et al. MicroRNA-1 targets Slug and endows lung cancer A549 cells with epithelial and anti-tumorigenic properties. *Exp Cell Res* 2013;**319**(3):77-88.
21. Witta SE, Gemmill RM, Hirsch FR, et al. Restoring E-Cadherin Expression Increases Sensitivity to Epidermal Growth Factor Receptor Inhibitors in Lung Cancer Cell Lines. *Cancer Res* 2006;**66**(2):944-50.
